# Supplementary material for: Long-term storage of feces at −80 °C versus −20 °C is negligible for 16S rRNA amplicon profiling of the equine bacterial microbiome
Source: PubMed Central journal article supplement (PMC7953882; doi:10.7717/peerj.10837), 2021-03-09
Supplement: peerj-09-10837-s040.pdf [file peerj-09-10837-s040.pdf]

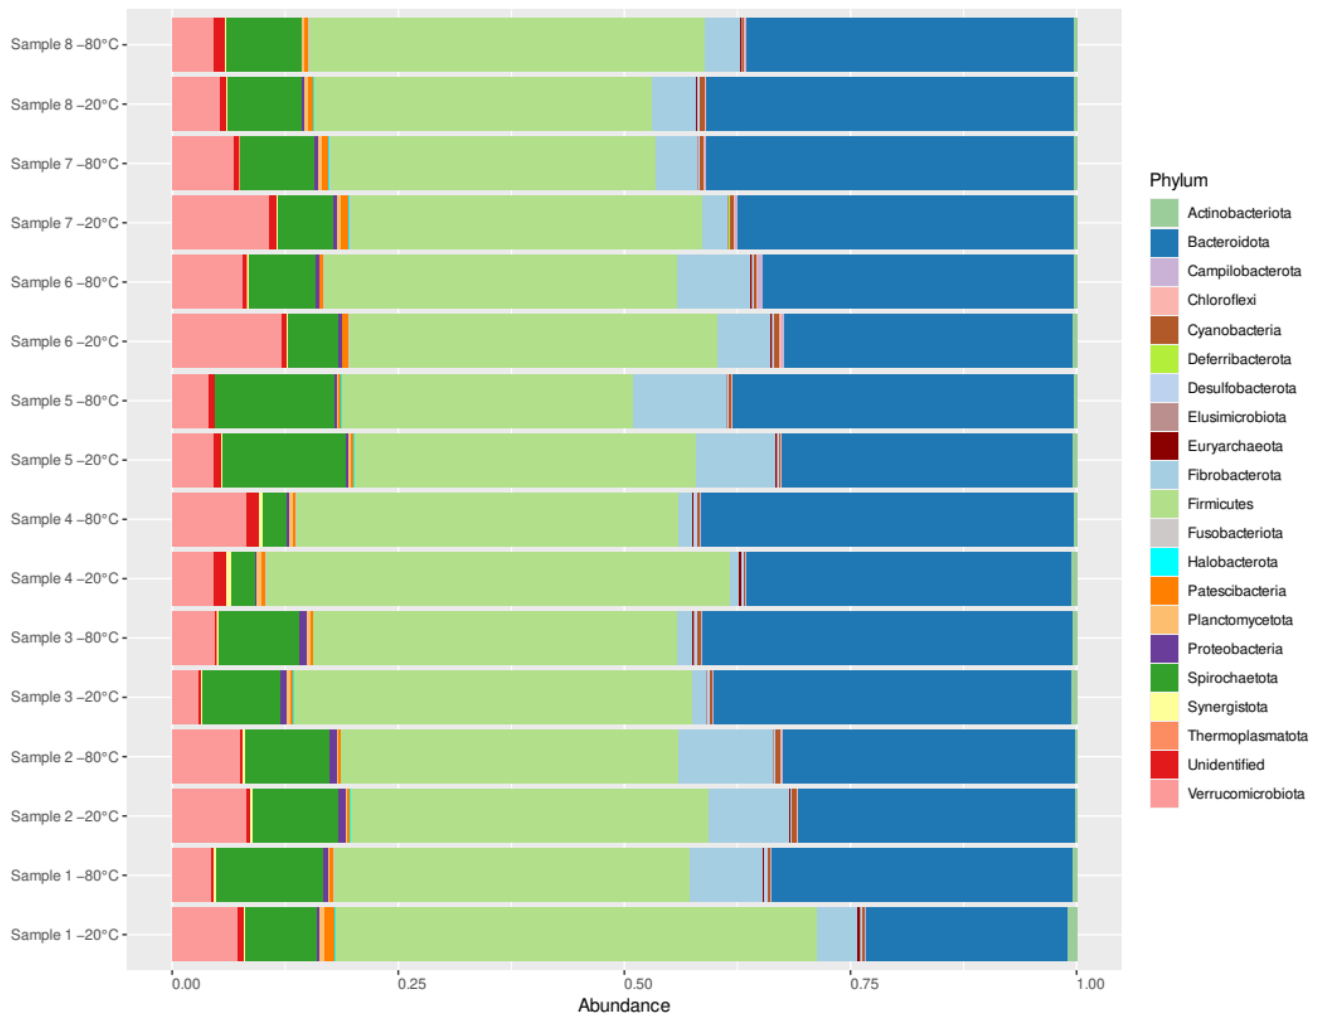

**Supplementary Figure 1: Abundances of bacterial phyla identified in fecal samples collected from feral horses on Sable Island, Nova Scotia, Canada, using 16S rRNA sequencing.** Samples from eight horses were divided into aliquots, stored at both -20°C and -80°C for four years, and characterized using 16S amplicon sequencing. Taxonomy was assigned to amplicon sequence variants (ASVs), and abundances were made proportional then aggregated to the phylum level. Phyla with low abundances (< 1% within a sample) were pooled for clarity.
